1 **Discovery and whole genome sequencing of a human clinical isolate of the novel species**

2 ***Klebsiella quasivariicola* sp. nov.**

3

4 Running Head: Discovery of *Klebsiella quasivariicola* sp. nov.

5

6 S. Wesley Long<sup>1,2,#</sup>, Sarah E. Linson<sup>1</sup>, Matthew Ojeda Saavedra<sup>1</sup>, Concepcion Cantu<sup>1</sup>, James J.

7 Davis<sup>3,4</sup>, Thomas Brettin<sup>3,4</sup>, Randall J. Olsen<sup>1,2</sup>.

8

9 <sup>1</sup>Center for Molecular and Translational Human Infectious Diseases Research, Department of

10 Pathology and Genomic Medicine, Houston Methodist Research Institute and Houston Methodist

11 Hospital, Houston, Texas, USA

12 <sup>2</sup>Department of Pathology and Laboratory Medicine, Weill Cornell Medical College, New York,

13 New York USA

14 <sup>3</sup>Computing, Environment and Life Sciences, Argonne National Laboratory, Argonne IL, 60439,

15 USA

16 <sup>4</sup>Computation Institute, University of Chicago, Chicago, Illinois, 60637, USA

17 #Address correspondence to: S. Wesley Long, M.D., Ph.D., Department of Pathology and

18 Genomic Medicine, Houston Methodist Hospital, 6565 Fannin St., B250, Houston, Texas 77030.

19 Abstract word count:160

20 Text word count: 1,130

21 **ABSTRACT**

22 Originally thought to be a single species, *Klebsiella pneumoniae* has been divided into three  
23 distinct species: *K. pneumoniae*, *K. quasipneumoniae* and *K. variicola*. In a recent study of 1,777  
24 extended-spectrum beta-lactamase (ESBL)-producing *Klebsiella* strains recovered from human  
25 infections in Houston, we discovered one strain (KPN1705) causing a wound infection that was  
26 phylogenetically distinct from all currently recognized *Klebsiella* species. Whole genome  
27 sequencing of strain KPN1705 revealed that it was single locus variant of the multilocus  
28 sequence type ST-1155. This sequence type was reported only once previously. To further  
29 investigate the phylogeny of these two organisms, we sequenced the genome of strain KPN1705  
30 to closure and compared its genetic features to *Klebsiella* reference strains. Results demonstrated  
31 strain KPN1705 extensively shares core gene content, antimicrobial resistance genes, and  
32 plasmids with *K. pneumoniae*, *K. quasipneumoniae* and *K. variicola*. Since strain KPN1705 and  
33 the previously reported novel strain are phylogenetically most closely related to *K. variicola*, we  
34 propose the name *K. quasivariicola* sp. nov.

35

36 **IMPORTANCE**

37 *K. pneumoniae*, *K. quasipneumoniae* and *K. variicola* are serious human pathogens that are  
38 increasingly associated with multidrug resistance and high morbidity and mortality. In a recent  
39 study of a large, comprehensive, population-based collection of antibiotic resistant *Klebsiella*  
40 isolates recovered from human patients, we discovered a novel species that is related to but  
41 distinct from *K. variicola*. This clonal group has been reported only once previously. We  
42 sequenced the genome of this clinical isolate and compared its genetic features to other  
43 *Klebsiella* strains. We propose the name *K. quasivariicola* sp. nov. for this new species.

44

45 **OBSERVATION**

46           Members of the genus *Klebsiella* are a common cause of human morbidity and mortality  
47 (1, 2). Many community-acquired and healthcare-associated outbreaks of invasive *K.*  
48 *pneumoniae* disease have been reported (3, 4). Over the past two decades, related *Klebsiella*  
49 species have been identified as distinct from *K. pneumoniae* and classified (5-8). In a recent  
50 large, comprehensive, population based study of 1,777 extended-spectrum beta-lactamase  
51 (ESBL) producing *Klebsiella* strains recovered in our clinical microbiology laboratory, we  
52 discovered a unique isolate KPN1705 (9, 10). It was genetically related to, but distinct from, *K.*  
53 *variicola*. We sequenced the genome of this strain, which belongs to a new species herein  
54 termed *Klebsiella quasivariicola* sp. nov., to closure and compared its genetic features to other  
55 *Klebsiella* reference strains.

56

## 57 RESULTS

### 58 Whole genome sequencing reveals *Klebsiella quasivariicola* sp. nov., a novel *Klebsiella* 59 pathogenic to humans

60 In a recent study of 1,777 ESBL-producing *K. pneumoniae* isolates recovered from patients in  
61 our health care system, we unexpectedly discovered that 28 strains were phylogenetically allied  
62 with *K. variicola* (13 strains) and *K. quasipneumoniae* (15 strains)(10). We identified strain  
63 KPN1705 as a distinct outlier in the phylogenetic analysis. It shared a common branch with the  
64 *K. variicola*, yet was as distant from the *K. pneumoniae*, *K. quasipneumoniae*, and *K. variicola*  
65 reference genomes as they were from each other (Figure 1).

66 To determine if strains similar to KPN1705 had been previously reported, we determined  
67 its multilocus sequence type (MLST). Results revealed that it is a single locus variant of ST-  
68 1155, with three SNPs in the *infB*\_110 allele. A search of publicly available databases found one  
69 previous report of an ST-1155 *Klebsiella*, which was a description of a novel *Klebsiella* dubbed  
70 Strain 10982 (11). Strain 10982 was recovered from a perianal swab collected on an ICU patient  
71 in Maryland in 2005, as part of a study of AmpC-mediated antimicrobial resistance (11).

72 To begin assessing the genetic relationship between strain KPN1705 and other *Klebsiella*,  
73 we sequenced the genome of KPN1705 to closure. The KPN1705 chromosome is 5,540,188 bp,  
74 and three plasmids were identified (described below). Strain 10982 was previously sequenced by  
75 Hazen et al. and the assembled 218 contigs are published (11). SNPs were called for reference  
76 genomes of *K. pneumoniae* (NJST258\_2), *K. quasipneumoniae* (700603), *K. variicola* (At-22),  
77 and Strain 10982, using our closed KPN1705 as a reference. The pairwise distance between *K.*  
78 *pneumoniae* and *K. variicola* compared to KPN1705 was 250,000 and 251,939 SNPs,  
79 respectively. Similarly, the pairwise distance between *K. pneumoniae* and *K. variicola* and

80 Strain 10982 was 253,227 and 253,864 SNPs. This level of difference between the novel strains  
81 and other *Klebsiella* clades is similar to the distance separating the *K. pneumoniae*, *K. variicola*  
82 and *K. quasipneumoniae* from one another (mean: 269,799 SNPs, range: 247,050-287,991 SNPs)  
83 (Figure 2A). In comparison, KPN1705 and Strain 10982 were closely related, differing from one  
84 another by only 34,455 SNPs (Figure 1). This level of difference is similar to the average  
85 pairwise distance between any two *K. variicola* strains (average: 38,056 SNPs, range: 31,777 –  
86 45,299) (10). Together, these whole genome sequence data suggest that KPN1705 and Strain  
87 10982 represent a novel *Klebsiella* species, and we propose the name *Klebsiella quasivariicola*  
88 sp. nov.

89

#### 90 **Plasmid and phage content in *Klebsiella quasivariicola* sp. nov. strain KPN1705**

91 Next, we characterized the plasmids carried by strain KPN1705. Using our assembled whole  
92 genome data, we identified three plasmids, pKPN1705-1 (240,771bp), pKPN1705-2 (97,896bp),  
93 and pKPN1705-3 (67,851bp). These plasmids were similar to others found in *Klebsiella* species  
94 and carried a diverse array of replicons and antimicrobial resistance genes. Six intact phage  
95 regions were predicted in the core chromosome, consisting of 359 coding sequences in 322.7 kb  
96 of core chromosomal sequence (Table S1 Phage).

97

#### 98 **Antimicrobial gene content in *Klebsiella quasivariicola* sp. nov.**

99 The SHV-LEN-OKP beta-lactamases are core chromosomal genes of *Klebsiella* that are usually  
100 segregated by *Klebsiella* species: *K. pneumoniae* (SHV restricted), *K. quasipneumoniae* (OKP  
101 restricted), and *K. variicola* (LEN restricted) (8, 12, 13). SHV beta-lactamase genes can also be  
102 carried on plasmids (14). We assessed the antimicrobial gene content of KPN1705 and

103 determined it carries the LEN-24 beta-lactamase on its chromosome, similar to what is  
104 commonly found in *K. variicola*. This further contributed to our suggestion to call this novel  
105 species *K. quasivariicola* sp. nov. KPN1705 also carried the gene encoding the SHV-30 ESBL  
106 enzyme on plasmid pKPN1705-3. Genes encoding KPC, OXA, CTX-M, TEM and NDM-1 were  
107 not detected.

108

109 **Gene content comparison between *K. pneumoniae*, *K. variicola*, *K. quasipneumoniae* and *K.***  
110 ***quasivariicola***

111 We compared the gene content between our ESBL-producing *K. pneumoniae*, *K. variicola*, *K.*  
112 *quasipneumoniae* and *K. quasivariicola* sp. nov.. We identified a total of 8,184 unique genes  
113 present in the pangenome of all four species (Figure 2B). A *Klebsiella* core genome consisted of  
114 3,357 unique genes that were present in the reference genome of each clade. A bidirectional  
115 BLAST comparing the 4 reference genomes to KPN1705 shows the distance between each is  
116 similar, with gaps present in the regions corresponding to 6 predicted phage regions (Figure 2A).  
117 A table of the gene presence or absence is included in the supplemental (Table S2 Gene  
118 Content).

119

## 120 DISCUSSION

121 *K. pneumoniae* is a well-known cause of human morbidity and mortality. Although less  
122 common, the closely related organisms *K. variicola* and *K. quasipneumoniae* also cause life-  
123 threatening infections (5, 7, 10, 15). The difficulty that conventional clinical microbiology  
124 laboratories have in distinguishing *K. variicola* and *K. quasipneumoniae* from *K. pneumoniae*  
125 may contribute to our underestimation of their potential as human pathogens (10, 16). The  
126 discovery of this novel clade of *Klebsiella*, the *K. quasivariicola* sp. nov., represents yet another  
127 *Klebsiella* species capable of causing serious human infections. Importantly, when novel strain  
128 10982 was first described, the investigators questioned whether it had simply colonized the  
129 gastrointestinal tract or if it was potentially pathogenic. Our novel strain KPN1705 was  
130 recovered from a wound culture, strongly suggesting a causative role for the abscess. In addition,  
131 the detection of multiple antimicrobial resistance genes, including a SHV ESBL enzyme,  
132 increases its virulence potential.

133 Our whole genome sequence data provides clues to the relationships between the  
134 *Klebsiella* clades. The core genome content of *K. quasivariicola* sp. nov., is similar to *K.*  
135 *pneumoniae*, *K. variicola* and *K. quasipneumoniae*, despite the extensive diversity that has been  
136 reported to occur within and between clades (6, 9, 10). Also, consistent with previous reports, (6)  
137 we observed the plasmids present in KPN1705 to be similar to those found in other *Klebsiella*  
138 species. Importantly, these plasmids carry multiple genes encoding virulence factors and  
139 antimicrobial resistance genes (17).

140 These data provide new insight to the natural history and pathogenesis of *Klebsiella*  
141 organisms. Additional strains of *Klebsiella quasivariicola* sp. nov. are needed to better  
142 characterize this new species. Improved diagnostic methods or widespread use of whole genome



143 sequencing of clinical isolates may be necessary to ensure timely and appropriate identification

144 of these pathogens.

145

## 146 **MATERIALS AND METHODS**

### 147 **Whole genome sequencing of *Klebsiella***

148 The genome of strain KPN1705 was previously described using Illumina short read data (9). To  
149 obtain long reads to close the genome, we sequenced the genome of strain KPN1705 to closure  
150 using the 1D Ligation sequencing kit, R9.4 flow cell, and Oxford Nanopore Technologies  
151 MinION Mk-Ib sequencer.

### 152 **Bioinformatics analysis of strains**

153 The single nucleotide polymorphism calling pipeline and additional bioinformatics pipelines  
154 were described previously (9). BLAST was performed using the NCBI BLAST toolkit and CLC  
155 Genomics Workbench v.10.1. Visualization of SNP distribution was performed using CLC  
156 Genomics Workbench v.10.1. FASTQ files were assembled into contigs using Spades v3.10.1,  
157 and contigs were annotated using Prokka v1.12 (18, 19). Unicycler v0.4.0 was used for hybrid  
158 assembly and polishing of short reads and long reads into a closed genome for KPN1705 (20).  
159 Gene content analysis was performed using Roary v3.6.1 (21). Bidirectional BLAST and circos  
160 visualization were performed using PATRIC ([www.patricbrc.org](http://www.patricbrc.org)). Assembly of SNPs into  
161 phylogenetic trees was accomplished with the scripts prephix v3.3.0, phrecon v4.6.0, and  
162 FastTreeMP v2.1 (22). Phage regions were predicted using PHASTER (23). Prephix and phrecon  
163 are available from <https://github.com/codinghedgehog>. The Venn diagram was made in RStudio  
164 1.0.136 using R 3.3.2 and the VennDiagram package v1.6.17 (24).

### 165 **MALDI-TOF Identification**

166 KPN1705 was isolated by the Houston Methodist Diagnostic Microbiology Laboratory as  
167 described previously (25).

### 168 **Accession Numbers**

169 The genomes of the strain sequenced for this study have been deposited in the NCBI database  
170 under BioProject PRJNA376414 and BioSample SAMN06438648. The accession numbers for  
171 the KPN1705 closed genome and plasmids are CP022823-CP022826. Reference genome  
172 Genbank accession numbers are as follows: NJST258\_2 (CP006918.1), 700603 (CP014696.2),  
173 At-22 (CP001891.1), and Strain 10982 (GCA\_000523395.1).

#### 174 **ACKNOWLEDGEMENTS**

175 This work was supported by funds from the National Institute of Allergy and Infectious  
176 Diseases, National Institutes of Health, Department of Health and Human Service (contract  
177 HHSN272201400027C). We acknowledge Dr. J. Kristie Johnson for helpful discussions  
178 regarding Strain 10982, and Kathryn Stockbauer for help in preparing this manuscript.

179

180 **REFERENCES**

- 181
- 182 1. **Wyres KL, Holt KE.** 2016. *Klebsiella pneumoniae* population genomics and  
183 antimicrobial-resistant clones. Trends Microbiol **24**:944-956.
- 184 2. **Li B, Zhao Y, Liu C, Chen Z, Zhou D.** 2014. Molecular pathogenesis of *Klebsiella*  
185 *pneumoniae*. Future Microbiol **9**:1071-1081.
- 186 3. **Snitkin ES, Zelazny AM, Thomas PJ, Stock F, Group NCSP, Henderson DK,**  
187 **Palmore TN, Segre JA.** 2012. Tracking a hospital outbreak of carbapenem-resistant  
188 *Klebsiella pneumoniae* with whole-genome sequencing. Sci Transl Med **4**:148ra116.
- 189 4. **Satlin MJ, Chen L, Patel G, Gomez-Simmonds A, Weston G, Kim AC, Seo SK,**  
190 **Rosenthal ME, Sperber SJ, Jenkins SG, Hamula CL, Uhlemann AC, Levi MH,**  
191 **Fries BC, Tang YW, Juretschko S, Rojzman AD, Hong T, Mathema B, Jacobs MR,**  
192 **Walsh TJ, Bonomo RA, Kreiswirth BN.** 2017. Multicenter Clinical and Molecular  
193 Epidemiological Analysis of Bacteremia Due to Carbapenem-Resistant  
194 Enterobacteriaceae (CRE) in the CRE Epicenter of the United States. Antimicrob Agents  
195 Chemother **61**.
- 196 5. **Brisse S, Verhoef J.** 2001. Phylogenetic diversity of *Klebsiella pneumoniae* and  
197 *Klebsiella oxytoca* clinical isolates revealed by randomly amplified polymorphic DNA,  
198 *gyrA* and *parC* genes sequencing and automated ribotyping. Int J Syst Evol Microbiol  
199 **51**:915-924.
- 200 6. **Holt KE, Wertheim H, Zadoks RN, Baker S, Whitehouse CA, Dance D, Jenney A,**  
201 **Connor TR, Hsu LY, Severin J, Brisse S, Cao H, Wilksch J, Gorrie C, Schultz MB,**  
202 **Edwards DJ, Nguyen KV, Nguyen TV, Dao TT, Mensink M, Minh VL, Nhu NT,**

- 203           **Schultsz C, Kuntaman K, Newton PN, Moore CE, Strugnell RA, Thomson NR.**  
204           2015. Genomic analysis of diversity, population structure, virulence, and antimicrobial  
205           resistance in *Klebsiella pneumoniae*, an urgent threat to public health. Proc Natl Acad Sci  
206           U S A **112**:E3574-3581.
- 207    7.       **Rosenblueth M, Martinez L, Silva J, Martinez-Romero E.** 2004. *Klebsiella variicola*,  
208           a novel species with clinical and plant-associated isolates. Syst Appl Microbiol **27**:27-35.
- 209    8.       **Brisse S, Passet V, Grimont PA.** 2014. Description of *Klebsiella quasipneumoniae* sp.  
210           nov., isolated from human infections, with two subspecies, *Klebsiella quasipneumoniae*  
211           subsp. *quasipneumoniae* subsp. nov. and *Klebsiella quasipneumoniae* subsp.  
212           *similipneumoniae* subsp. nov., and demonstration that *Klebsiella singaporensis* is a junior  
213           heterotypic synonym of *Klebsiella variicola*. Int J Syst Evol Microbiol **64**:3146-3152.
- 214    9.       **Long SW, Olsen RJ, Eagar TN, Beres SB, Zhao P, Davis JJ, Brettin T, Xia F,**  
215           **Musser JM.** 2017. Population genomic analysis of 1,777 extended-spectrum beta-  
216           lactamase-producing *Klebsiella pneumoniae* isolates, Houston, Texas: Unexpected  
217           abundance of clonal group 307. mBio **8**.
- 218    10.      **Long SW, Linson SE, Ojeda Saavedra M, Cantu C, Davis JJ, Brettin T, Olsen RJ.**  
219           2017. Whole-Genome Sequencing of Human Clinical *Klebsiella pneumoniae* Isolates  
220           Reveals Misidentification and Misunderstandings of *Klebsiella pneumoniae*, *Klebsiella*  
221           *variicola*, and *Klebsiella quasipneumoniae*. mSphere **2**.
- 222    11.      **Hazen TH, Zhao L, Sahl JW, Robinson G, Harris AD, Rasko DA, Johnson JK.**  
223           2014. Characterization of *Klebsiella* sp. Strain 10982, a colonizer of humans that contains  
224           novel antibiotic resistance alleles and exhibits genetic similarities to plant and clinical  
225           *Klebsiella* isolates. Antimicrob Agents Chemother **58**:1879-1888.

- 226 12. **Tarnberg M, Nilsson LE, Monstein HJ.** 2009. Molecular identification of (bla)SHV,  
227 (bla)LEN and (bla)OKP beta-lactamase genes in *Klebsiella pneumoniae* by bi-directional  
228 sequencing of universal SP6- and T7-sequence-tagged (bla)SHV-PCR amplicons. Mol  
229 Cell Probes **23**:195-200.
- 230 13. **Fonseca EL, Ramos ND, Andrade BG, Morais LL, Marin MF, Vicente AC.** 2017. A  
231 one-step multiplex PCR to identify *Klebsiella pneumoniae*, *Klebsiella variicola*, and  
232 *Klebsiella quasipneumoniae* in the clinical routine. Diagn Microbiol Infect Dis **87**:315-  
233 317.
- 234 14. **Matthew M, Hedges RW, Smith JT.** 1979. Types of beta-lactamase determined by  
235 plasmids in gram-negative bacteria. J Bacteriol **138**:657-662.
- 236 15. **Maatallah M, Vading M, Kabir MH, Bakhrouf A, Kalin M, Naucner P, Brisse S,**  
237 **Giske CG.** 2014. *Klebsiella variicola* is a frequent cause of bloodstream infection in the  
238 Stockholm area, and associated with higher mortality compared to *K. pneumoniae*. PLoS  
239 One **9**:e113539.
- 240 16. **Bowers JR, Lemmer D, Sahl JW, Pearson T, Driebe EM, Wojack B, Saubolle MA,**  
241 **Engelthaler DM, Keim P.** 2016. KlebSeq, a diagnostic tool for surveillance, detection,  
242 and monitoring of *Klebsiella pneumoniae*. J Clin Microbiol **54**:2582-2596.
- 243 17. **Zurfluh K, Poirel L, Nordmann P, Klumpp J, Stephan R.** 2015. First detection of  
244 *Klebsiella variicola* producing OXA-181 carbapenemase in fresh vegetable imported  
245 from Asia to Switzerland. Antimicrob Resist Infect Control **4**:38.
- 246 18. **Nurk S, Bankevich A, Antipov D, Gurevich A, Korobeynikov A, Lapidus A,**  
247 **Prjibelsky A, Pyshkin A, Sirotkin A, Sirotkin Y, Stepanauskas R, McLean J, Lasken**  
248 **R, Clingenpeel SR, Woyke T, Tesler G, Alekseyev MA, Pevzner PA.** 2013.

- 249 Assembling Genomes and Mini-metagenomes from Highly Chimeric Reads, p 158-170.  
250 *In* Deng M, Jiang R, Sun F, Zhang X (ed), Research in Computational Molecular  
251 Biology: 17th Annual International Conference, RECOMB 2013, Beijing, China, April 7-  
252 10, 2013 Proceedings doi:10.1007/978-3-642-37195-0\_13. Springer Berlin Heidelberg,  
253 Berlin, Heidelberg.
- 254 19. **Seemann T.** 2014. Prokka: rapid prokaryotic genome annotation. *Bioinformatics*  
255 **30**:2068-2069.
- 256 20. **Wick RR, Judd LM, Gorrie CL, Holt KE.** 2017. Unicycler: Resolving bacterial  
257 genome assemblies from short and long sequencing reads. *PLoS Comput Biol*  
258 **13**:e1005595.
- 259 21. **Page AJ, Cummins CA, Hunt M, Wong VK, Reuter S, Holden MTG, Fookes M,**  
260 **Falush D, Keane JA, Parkhill J.** 2015. Roary: rapid large-scale prokaryote pan genome  
261 analysis. *Bioinformatics* **31**:3691-3693.
- 262 22. **Price MN, Dehal PS, Arkin AP.** 2010. FastTree 2--approximately maximum-likelihood  
263 trees for large alignments. *PLoS One* **5**:e9490.
- 264 23. **Arndt D, Grant JR, Marcu A, Sajed T, Pon A, Liang Y, Wishart DS.** 2016.  
265 PHASTER: a better, faster version of the PHAST phage search tool. *Nucleic Acids Res*  
266 **44**:W16-21.
- 267 24. **Chen H, Boutros PC.** 2011. VennDiagram: a package for the generation of highly-  
268 customizable Venn and Euler diagrams in R. *BMC Bioinformatics* **12**:35.
- 269 25. **Wimmer JL, Long SW, Cernoch P, Land GA, Davis JR, Musser JM, Olsen RJ.**  
270 2012. Strategy for rapid identification and antibiotic susceptibility testing of gram-

271 negative bacteria directly recovered from positive blood cultures using the Bruker  
272 MALDI Biotyper and the BD Phoenix system. J Clin Microbiol **50**:2452-2454.  
273  
274



275 **Figure Legends**

276 **Fig 1.** Genetic relationships among *Klebsiella quasivariicola* sp. nov. strains KPN1705 and  
277 Strain 10982 and reference strains of *K. pneumoniae* (NJST258\_2), *K. variicola* (At-22), and *K.*  
278 *quasipneumoniae* (700603). Phylogenetic relationships were defined by the neighbor-joining  
279 method in FastTreeMP with double precision using the closed KPN1705 genome as a reference.  
280 The core genome was defined as the chromosomal sequence with the 6 predicted phage sequence  
281 regions excluded.

282

283 **Fig 2.** Gene content differences between the reference genomes *Klebsiella quasivariicola* sp.  
284 nov. (KPN1705), *K. pneumoniae* (NJST258\_2), *K. variicola* (At-22), and *K. quasipneumoniae*  
285 (700603). A. Bidirectional BLAST was performed by using the PATRIC resource to illustrate  
286 the differences in gene content between these two reference genomes. The color indicates the  
287 percent identity of the BLAST hit for each gene, with darker shading indicating a bidirectional  
288 hit and lighter shading indicating a unidirectional hit. Outer-most ring is the KPN1705  
289 chromosome reference, followed by *K. pneumoniae* NJST258\_2, *K. quasipneumoniae* 700603,  
290 and *K. variicola* At-22 on the innermost ring. B. Venn diagram showing shared gene content  
291 between the *K. pneumoniae* NJST258\_2 (Kp, red), *K. quasipneumoniae* 700603 (Kqp, yellow),  
292 *K. variicola* At-22 (Kv, blue), and *K. quasivariicola* sp. nov. (Kqv, green) as determined by  
293 Roary.

294

295 **Figure 1**

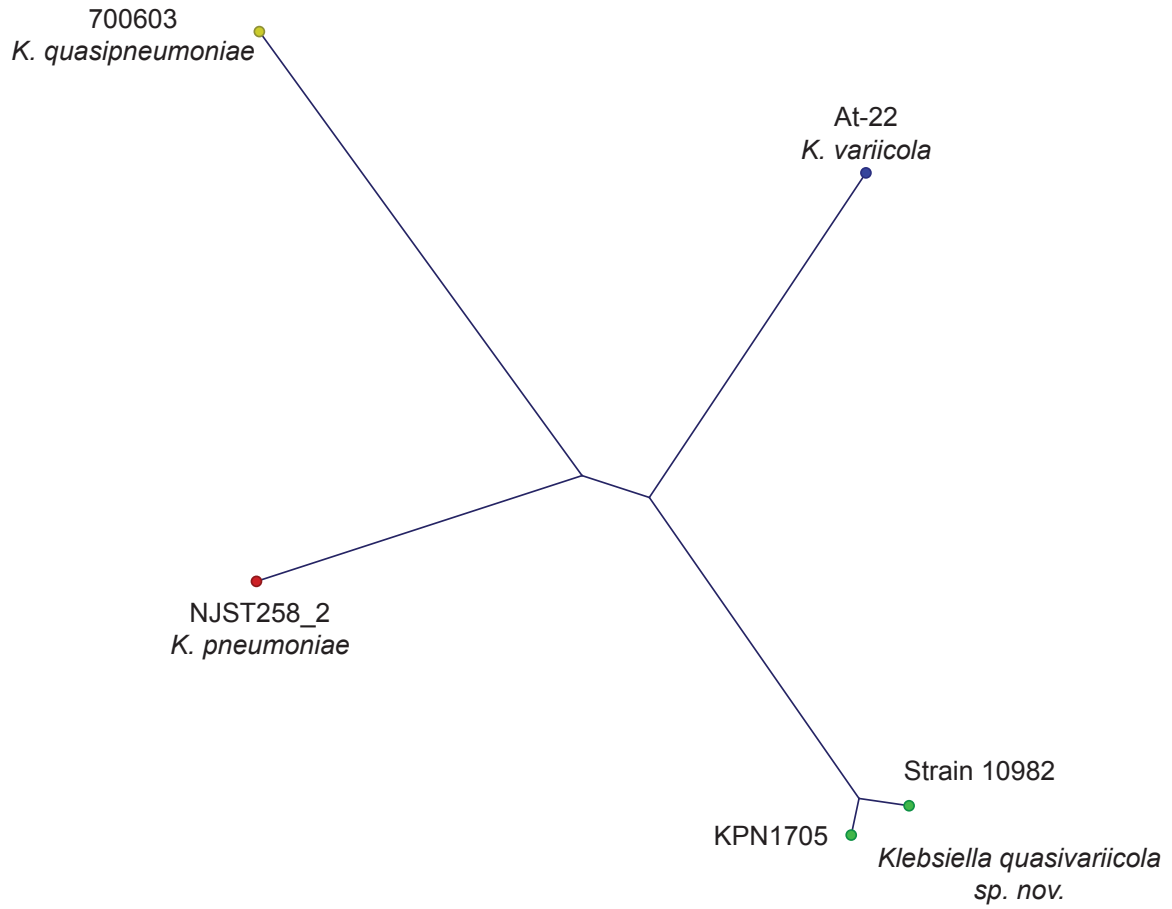

296

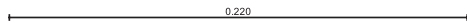

297 **Figure 2**

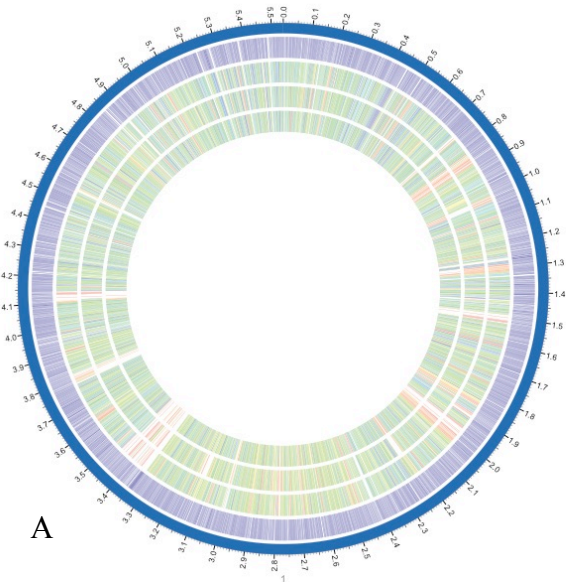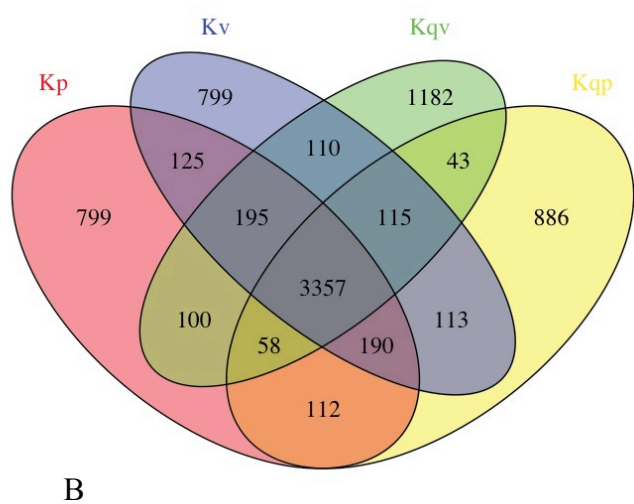

298
